# Supplementary material for: Metal–organic and supramolecular lead(ii) networks assembled from isomeric nicotinoylhydrazone blocks: the effects of ligand geometry and counter-ion on topology and supramolecular assembly
Source: Royal Society of Chemistry journal article supplement (doi:10.1039/c6ce00900j), 2016-01-01
Supplement: c6ce00900j1.pdf [file c6ce00900j1.pdf]

Metal-organic and Supramolecular Lead(II) Networks  
Assembled from Isomeric Nicotinoylhydrazone Blocks: The  
Effects of Ligand Geometry and Counter-ion on Topology and  
Supramolecular Assembly

Ghodrat Mahmoudi, Antonio Bauzá, Antonio Frontera, Piotr Garczarek, Najah Mhesn,  
Christos Lampropoulos, Vladimir Stilinović

SUPPLEMENTARY  
INFORMATION

|                                              |    |
|----------------------------------------------|----|
| Crystallographic data and additional figures | 3  |
| Detailed Hirshfeld surface analysis          | 15 |
| IR spectra                                   | 18 |

**Table S1** Crystallographic data for 1-6

| Compound                                                                    | <b>1</b>                                                           | <b>2</b>                                                                         | <b>3</b>                                                                                      |
|-----------------------------------------------------------------------------|--------------------------------------------------------------------|----------------------------------------------------------------------------------|-----------------------------------------------------------------------------------------------|
| Formula                                                                     | C <sub>13</sub> H <sub>12</sub> Cl <sub>2</sub> N <sub>4</sub> OPb | C <sub>13</sub> H <sub>12</sub> Cl <sub>2</sub> N <sub>6</sub> O <sub>7</sub> Pb | C <sub>30</sub> H <sub>24</sub> N <sub>12</sub> O <sub>2</sub> Pb <sub>2</sub> S <sub>4</sub> |
| Formula weight                                                              | 518.36                                                             | 571.48                                                                           | 1127.23                                                                                       |
| Temperature / K                                                             | 100(2)                                                             | 100(2)                                                                           | 123(2)                                                                                        |
| Wavelength / nm                                                             | 0.71073 Å                                                          | 0.71073 Å                                                                        | 0.71073 Å                                                                                     |
| Crystal system                                                              | Monoclinic                                                         | Triclinic                                                                        | Triclinic                                                                                     |
| Space group                                                                 | <i>P</i> 2 <sub>1</sub> / <i>c</i>                                 | <i>P</i> $\bar{1}$                                                               | <i>P</i> $\bar{1}$                                                                            |
| Unit cell dimensions                                                        |                                                                    |                                                                                  |                                                                                               |
| <i>a</i> / Å                                                                | 10.4863(14)                                                        | 9.0862(4)                                                                        | 7.5527(2)                                                                                     |
| <i>b</i> / Å                                                                | 14.790(2)                                                          | 9.3122(4)                                                                        | 14.5337(5)                                                                                    |
| <i>c</i> / Å                                                                | 10.8544(15)                                                        | 11.5175(5)                                                                       | 16.8369(4)                                                                                    |
| $\alpha$ / °                                                                | 90                                                                 | 84.9050(10)                                                                      | 102.817(2)                                                                                    |
| $\beta$ / °                                                                 | 116.161(2)                                                         | 72.8090(10)                                                                      | 94.897(2)                                                                                     |
| $\gamma$ / °                                                                | 90                                                                 | 62.7750(10)                                                                      | 98.141(2)                                                                                     |
| Volume / Å <sup>3</sup>                                                     | 1511.0(4)                                                          | 826.61(6)                                                                        | 1770.85(9)                                                                                    |
| <i>Z</i>                                                                    | 4                                                                  | 2                                                                                | 2                                                                                             |
| <i>D</i> <sub>calculated</sub> / g cm <sup>-3</sup>                         | 2.279                                                              | 2.296                                                                            | 2.114                                                                                         |
| $\mu$ / mm <sup>-1</sup>                                                    | 11.522                                                             | 10.259                                                                           | 9.779                                                                                         |
| <i>F</i> (000)                                                              | 968                                                                | 540                                                                              | 1064                                                                                          |
| Crystal size / mm <sup>3</sup>                                              | 0.22 × 0.19 × 0.15                                                 | 0.23 × 0.17 × 0.10                                                               | 0.60 × 0.15 × 0.11                                                                            |
| Theta range for data collection/°                                           | 2.16 – 29.18                                                       | 2.46 – 29.14                                                                     | 3.13–30.24°                                                                                   |
| Index ranges                                                                | –14 ≤ <i>h</i> ≤ 14                                                | –11 ≤ <i>h</i> ≤ 12                                                              | –9 ≤ <i>h</i> ≤ 9                                                                             |
|                                                                             | –19 ≤ <i>k</i> ≤ 20                                                | –12 ≤ <i>k</i> ≤ 12                                                              | –19 ≤ <i>k</i> ≤ 19                                                                           |
|                                                                             | –14 ≤ <i>l</i> ≤ 14                                                | –15 ≤ <i>l</i> ≤ 15                                                              | –22 ≤ <i>l</i> ≤ 22                                                                           |
| Reflections collected                                                       | 26047                                                              | 14331                                                                            | 25546                                                                                         |
| Independent reflections                                                     | 3940                                                               | 3973                                                                             | 8516                                                                                          |
| Refinement method                                                           | Full matrix                                                        | Full–matrix                                                                      | Full–matrix                                                                                   |
|                                                                             | least squares on <i>F</i> <sup>2</sup>                             | least–squares on <i>F</i> <sup>2</sup>                                           | least–squares on <i>F</i> <sup>2</sup>                                                        |
| Data / restraints / parameters                                              | 3940/0/191                                                         | 3973/0/245                                                                       | 8516/0/461                                                                                    |
| Goodness–of–fit on <i>F</i> <sup>2</sup>                                    | 1.032                                                              | 1.079                                                                            | 1.059                                                                                         |
| Final <i>R</i> indices [ <i>I</i> > 2σ( <i>I</i> )] <i>R</i> <sub>1</sub> = | 0.0183                                                             | 0.0192                                                                           | 0.0248                                                                                        |
| <i>wR</i> <sub>1</sub> =                                                    | 0.0403                                                             | 0.0484                                                                           | 0.0425                                                                                        |
| <i>R</i> Indices (all data) <i>R</i> <sub>2</sub> =                         | 0.0223                                                             | 0.0198                                                                           | 0.0248                                                                                        |
| <i>wR</i> <sub>2</sub> =                                                    | 0.0418                                                             | 0.0487                                                                           | 0.0454                                                                                        |
| $\Delta\rho$ / e Å <sup>-3</sup>                                            | 1.420, –0.802                                                      | 2.220, –1.173                                                                    | 0.691 – 0.716                                                                                 |

**Table S1 continued**

| Compound                                                                    | <b>4</b>                                                           | <b>5</b>                                                                         | <b>6</b>                                                         |
|-----------------------------------------------------------------------------|--------------------------------------------------------------------|----------------------------------------------------------------------------------|------------------------------------------------------------------|
| Formula                                                                     | C <sub>13</sub> H <sub>12</sub> Cl <sub>2</sub> N <sub>4</sub> OPb | C <sub>13</sub> H <sub>12</sub> Cl <sub>2</sub> N <sub>6</sub> O <sub>7</sub> Pb | C <sub>15</sub> H <sub>12</sub> N <sub>6</sub> OPbS <sub>2</sub> |
| Formula weight                                                              | 518.36                                                             | 571.48                                                                           | 563.62                                                           |
| Temperature / K                                                             | 150(2)                                                             | 100(2)                                                                           | 293(2)                                                           |
| Wavelength / nm                                                             | 0.71073 Å                                                          | 0.71075                                                                          | 0.71073 Å                                                        |
| Crystal system                                                              | Triclinic                                                          | Monoclinic                                                                       | Triclinic                                                        |
| Space group                                                                 | <i>P</i> $\bar{1}$                                                 | <i>P</i> 2 <sub>1</sub> / <i>c</i>                                               | <i>P</i> $\bar{1}$                                               |
| Unit cell dimensions                                                        |                                                                    |                                                                                  |                                                                  |
| <i>a</i> / Å                                                                | 7.8658(7)                                                          | 9.0537(3)                                                                        | 8.6135(4)                                                        |
| <i>b</i> / Å                                                                | 8.6864(7)                                                          | 23.1055(8)                                                                       | 9.3532(7)                                                        |
| <i>c</i> / Å                                                                | 11.0020(9)                                                         | 7.8698(3)                                                                        | 11.1952(10)                                                      |
| $\alpha$ / °                                                                | 100.321(4)                                                         | 90.00                                                                            | 87.356(7)                                                        |
| $\beta$ / °                                                                 | 92.891(4)                                                          | 98.4580(10)                                                                      | 87.566(5)                                                        |
| $\gamma$ / °                                                                | 95.189(4)                                                          | 90.00                                                                            | 82.906(5)                                                        |
| Volume / Å <sup>3</sup>                                                     | 734.82(11)                                                         | 1628.38(10)                                                                      | 893.46(11)                                                       |
| <i>Z</i>                                                                    | 2                                                                  | 4                                                                                | 2                                                                |
| <i>D</i> <sub>calculated</sub> / g cm <sup>-3</sup>                         | 2.343                                                              | 2.331                                                                            | 2.095                                                            |
| $\mu$ / mm <sup>-1</sup>                                                    | 11.846                                                             | 10.416                                                                           | 9.691                                                            |
| <i>F</i> (000)                                                              | 484                                                                | 1080                                                                             | 532                                                              |
| Crystal size / mm <sup>3</sup>                                              | 0.71 × 0.18 × 0.10                                                 | 0.16 × 0.05 × 0.05                                                               | 0.08 × 0.04 × 0.02                                               |
| Theta range for data collection/°                                           | 2.40 – 28.28                                                       | 1.76 – 33.17                                                                     | 2.91 – 28.60                                                     |
| Index ranges                                                                | -10 ≤ <i>h</i> ≤ 10                                                | -13 ≤ <i>h</i> ≤ 13                                                              | -11 ≤ <i>h</i> ≤ 11                                              |
|                                                                             | -11 ≤ <i>k</i> ≤ 11                                                | -35 ≤ <i>k</i> ≤ 32                                                              | -10 ≤ <i>k</i> ≤ 12                                              |
|                                                                             | -14 ≤ <i>l</i> ≤ 14                                                | -12 ≤ <i>l</i> ≤ 11                                                              | -15 ≤ <i>l</i> ≤ 14                                              |
| Reflections collected                                                       | 18736                                                              | 29363                                                                            | 8887                                                             |
| Independent reflections                                                     | 3653                                                               | 6193                                                                             | 4459                                                             |
| Refinement method                                                           | Full-matrix                                                        | Full matrix                                                                      | Full matrix                                                      |
|                                                                             | least-squares on <i>F</i> <sup>2</sup>                             | least squares on <i>F</i> <sup>2</sup>                                           | least squares on <i>F</i> <sup>2</sup>                           |
| Data / restraints / parameters                                              | 3653/0/190                                                         | 6193/0/245                                                                       | 4459/0/227                                                       |
| Goodness-of-fit on <i>F</i> <sup>2</sup>                                    | 1.053                                                              | 0.996                                                                            | 1.147                                                            |
| Final <i>R</i> indices [ <i>I</i> > 2σ( <i>I</i> )] <i>R</i> <sub>1</sub> = | 0.0177                                                             | 0.0291                                                                           | 0.0319                                                           |
| <i>wR</i> <sub>1</sub> =                                                    | 0.0455                                                             | 0.0586                                                                           | 0.0773                                                           |
| <i>R</i> Indices (all data) <i>R</i> <sub>2</sub> =                         | 0.0187                                                             | 0.0437                                                                           | 0.0363                                                           |
| <i>wR</i> <sub>2</sub> =                                                    | 0.0461                                                             | 0.0624                                                                           | 0.0793                                                           |
| $\Delta\rho$ / e Å <sup>-3</sup>                                            | 1.046, -1.750                                                      | 1.614, -2.063                                                                    | 1.901, -1.146                                                    |

Table S2. Selected bond lengths and angles in the structure of **1**.

| Bond lengths / Å          |           |                                        |            |
|---------------------------|-----------|----------------------------------------|------------|
| Pb1-Cl1                   | 2.9279(8) | Pb1-Cl2                                | 2.7027(8)  |
| Pb1-Cl2 <sup>i</sup>      | 3.1048(8) | Pb1-O1                                 | 2.5858(19) |
| Pb1-N1                    | 2.640(2)  | Pb1-N2                                 | 2.739(2)   |
| Pb1-N4 <sup>ii</sup>      | 2.841(2)  |                                        |            |
| Bond angles / °           |           |                                        |            |
| O1-Pb1-N1                 | 118.87(6) | O1-Pb1Cl2                              | 84.84(5)   |
| N1-Pb1-Cl2                | 86.37(5)  | O1-Pb1-N2                              | 59.53(6)   |
| N1-Pb1-N2                 | 59.50(7)  | Cl2-Pb1-N2                             | 77.43(5)   |
| O1-Pb1-N4 <sup>ii</sup>   | 70.67(6)  | N1-Pb1-N4 <sup>ii</sup>                | 168.08(6)  |
| Cl2-Pb1-N4 <sup>ii</sup>  | 87.53(5)  | N2-Pb1-N4 <sup>ii</sup>                | 128.79(6)  |
| O1-Pb1-Cl1                | 152.84(4) | N1-Pb1-Cl1                             | 86.47(5)   |
| Cl2-Pb1-Cl1               | 87.45(2)  | N2-Pb1-Cl1                             | 143.16(5)  |
| N4 <sup>ii</sup> -Pb1-Cl1 | 83.03(5)  | O1-Pb1-Cl2 <sup>i</sup>                | 83.74(5)   |
| N1-Pb1-Cl2 <sup>i</sup>   | 83.20(5)  | Cl2-Pb1-Cl2 <sup>i</sup>               | 158.40(2)  |
| N2-Pb1-Cl2 <sup>i</sup>   | 80.98(5)  | N4 <sup>ii</sup> -Pb1-Cl2 <sup>i</sup> | 105.78(5)  |

Symmetry codes – i: x, 1.5-y, 0.5+z; ii: 1-x, 2-y, 1-z;

Table S3. Selected bond lengths (Å) and angles (°) in the structure of **2**.

| Bond lengths           |           |                        |           |
|------------------------|-----------|------------------------|-----------|
| Pb1-O1                 | 2.511(2)  | Pb1-O2                 | 2.520(2)  |
| Pb1-O3                 | 2.757(2)  | Pb1-O5                 | 2.708(2)  |
| Pb1-O7 <sup>i</sup>    | 2.867(2)  | Pb-N1                  | 2.531(2)  |
| Pb1-N2                 | 2.638(2)  |                        |           |
| Bond angles            |           |                        |           |
| O1-Pb1-O2              | 77.47(7)  | O1-Pb1-N1              | 122.24(7) |
| O2-Pb1-N1              | 77.66(8)  | O1-Pb1-N2              | 61.10(7)  |
| O2-Pb1-N2              | 69.60(7)  | N1-Pb1-N2              | 61.50(8)  |
| O1-Pb1-O5              | 73.45(7)  | O2-Pb1-O5              | 132.44(6) |
| N1-Pb1-O5              | 87.03(7)  | N2-Pb1-O5              | 63.57(7)  |
| O1-Pb1-O3              | 117.79(8) | O2-Pb1-O3              | 48.46(7)  |
| N1-Pb1-O3              | 78.86(8)  | N2-Pb1-O3              | 112.06(7) |
| O5-Pb1-O3              | 165.28(8) | O1-Pb1-O7 <sup>i</sup> | 149.81(7) |
| O2-Pb1-O7 <sup>i</sup> | 119.13(7) | N1-Pb1-O7 <sup>i</sup> | 87.22(7)  |
| N2-Pb1-O7 <sup>i</sup> | 145.97(7) | O5-Pb1-O7              | 104.50(6) |
| O3-Pb1-O7 <sup>i</sup> | 70.90(7)  |                        |           |

Symmetry code - i: 2-x, 1-y, -z;

Table S4. Selected bond lengths (Å) and angles (°) in the structure of **3**.

| Bond lengths |           |            |            |
|--------------|-----------|------------|------------|
| Pb1-N10      | 2.506(3)  | Pb1-O1     | 2.525(3)   |
| Pb1-N3       | 2.550(3)  | Pb1-N1     | 2.575(3)   |
| Pb1-S1       | 3.002(1)  | Pb2-O2     | 2.518(3)   |
| Pb2-N7       | 2.635(3)  | Pb2-N12    | 2.667(3)   |
| Pb2-N5       | 2.710(3)  | Pb2-N4     | 2.763(3)   |
| Pb2-S3       | 2.8335(9) |            |            |
| Bond angles  |           |            |            |
| N10-Pb1-O1   | 78.73(10) | N10-Pb1-N3 | 79.33(9)   |
| O1-Pb1-N3    | 124.29(9) | N10-Pb1-N1 | 73.34(10)  |
| O1-Pb1-N1    | 62.42(8)  | N3-Pb1-N1  | 62.36(10)  |
| N10-Pb1-S1   | 152.23(8) | O1-Pb1-S1  | 88.73(6)   |
| N3-Pb1-S1    | 87.78(6)  | N1-Pb1-S1  | 78.90(7)   |
| O2-Pb-N7     | 119.61(9) | O2-Pb2-N12 | 149.38(9)  |
| N7-Pb2-N12   | 83.35(10) | O2-Pb2-N5  | 60.22(8)   |
| N7-Pb2-N5    | 59.72(9)  | N12-Pb2-N5 | 134.33(10) |
| O2-Pb2-N4    | 74.55(8)  | N7-Pb2-N4  | 160.33(9)  |
| N12-Pb2-N4   | 78.91(10) | N5-Pb2-N4  | 130.31(9)  |
| O2-Pb2-S3    | 88.86(6)  | N7-Pb2-S3  | 84.88(7)   |
| N12-Pb2-S3   | 72.29(8)  | N5-Pb2-S3  | 78.14(6)   |
| N4-Pb2-S3    | 81.70(6)  |            |            |

Table S5. Selected bond lengths (Å) and angles (°) in the structure of **4**.

| Bond lengths                            |           |                                         |           |
|-----------------------------------------|-----------|-----------------------------------------|-----------|
| Pb1-Cl1                                 | 2.7461(7) | Pb1-Cl1 <sup>i</sup>                    | 2.9223(8) |
| Pb1-Cl2                                 | 2.7961(8) | Pb1-O1 <sup>ii</sup>                    | 2.794(2)  |
| Pb1-N1                                  | 2.713(3)  | Pb1-N4 <sup>iii</sup>                   | 2.588(2)  |
| Bond angles                             |           |                                         |           |
| N4 <sup>iii</sup> -Pb1-N1               | 162.09(8) | N4 <sup>iii</sup> -Pb1-Cl1              | 81.82(6)  |
| N1-Pb1-Cl1                              | 80.91(6)  | N4 <sup>iii</sup> -Pb1-O1 <sup>ii</sup> | 75.30(7)  |
| N1-Pb1-O1 <sup>ii</sup>                 | 119.47(7) | Cl1-Pb1-O1                              | 151.47(5) |
| N4 <sup>iii</sup> -Pb1-Cl2              | 88.23(6)  | N1-Pb1-Cl2                              | 97.47(6)  |
| Cl1-Pb1-Cl2                             | 93.36(2)  | O1 <sup>ii</sup> -Pb1-Cl2               | 102.61(5) |
| N4 <sup>iii</sup> -Pb1-Cl1 <sup>i</sup> | 85.65(6)  | N1-Pb1-Cl1 <sup>i</sup>                 | 87.41(6)  |
| Cl1-Pb1-Cl1 <sup>i</sup>                | 82.40(2)  | O1 <sup>ii</sup> -Pb1-Cl1 <sup>i</sup>  | 79.13(5)  |
| Cl2-Pb1-Cl1 <sup>i</sup>                | 173.00(2) | Pb1-Cl1-Pb1 <sup>i</sup>                | 97.60(2)  |

Symmetry codes – i: 1-x, 1-y, -z; ii: 1-x, 1-y, 1-z; iii: x, 1+y, -1+z;

Table X5. Selected bond lengths (Å) and angles (°) in the structure of **5**.

| Bond lengths            |          |                         |           |
|-------------------------|----------|-------------------------|-----------|
| Pb1-O1 <sup>i</sup>     | 2.551(2) | Pb1-O2                  | 2.700(2)  |
| Pb1-O3                  | 2.641(3) | Pb1-O5                  | 2.792(2)  |
| Pb1-O6 <sup>i</sup>     | 2.874(2) | Pb1-O7 <sup>i</sup>     | 2.705(2)  |
| Pb1-N1                  | 2.776(3) | Pb1-N4 <sup>ii</sup>    | 2.722(3)  |
| Bond angles             |          |                         |           |
| O1 <sup>i</sup> -Pb1-O3 | 70.64(8) | O1 <sup>i</sup> -Pb1-O2 | 102.37(8) |

|                                       |           |                                       |           |
|---------------------------------------|-----------|---------------------------------------|-----------|
| O3-Pb1-O2                             | 47.71(7)  | O1 <sup>i</sup> -Pb1-O7 <sup>i</sup>  | 69.65(7)  |
| O3-Pb1-O7 <sup>i</sup>                | 135.92(7) | O2-Pb1-O7 <sup>i</sup>                | 162.15(7) |
| O1 <sup>i</sup> -Pb1-N4 <sup>ii</sup> | 72.57(7)  | O3-Pb1-N4 <sup>ii</sup>               | 90.85(8)  |
| O2-Pb1-N4 <sup>ii</sup>               | 67.30(8)  | O7 <sup>i</sup> -Pb1-N4 <sup>ii</sup> | 94.88(7)  |
| O1 <sup>i</sup> -Pb1-N1               | 140.30(7) | O3-Pb1-N1                             | 78.01(8)  |
| O2-Pb1-N1                             | 71.58(8)  | O7 <sup>i</sup> -Pb1-N1               | 124.97(8) |
| N4 <sup>ii</sup> -Pb1-N1              | 132.61(8) | O1 <sup>i</sup> -Pb1-O5               | 117.67(7) |
| O3-Pb1-O5                             | 154.37(7) | O2-Pb1-O5                             | 107.31(7) |
| O7 <sup>i</sup> -Pb1-O5               | 65.48(7)  | N4 <sup>ii</sup> -Pb1-O5              | 70.67(8)  |
| N1-Pb1-O5                             | 101.14(8) | O1 <sup>i</sup> -Pb1-O6 <sup>i</sup>  | 108.40(7) |
| O3-Pb1-O6 <sup>i</sup>                | 137.99(7) | O2-Pb1-O6 <sup>i</sup>                | 148.15(7) |
| O7 <sup>i</sup> -Pb1-O6 <sup>i</sup>  | 45.85(7)  | N4 <sup>ii</sup> -Pb1-O6 <sup>i</sup> | 129.95(7) |
| N1-Pb1-O6 <sup>i</sup>                | 79.46(7)  | O5-Pb1-O6 <sup>i</sup>                | 65.18(7)  |

Symmetry codes – i: x, 0.5-y, -0.5+z; ii: -x, -0.5+y, 1.5-z;

Table S6. Selected bond lengths (Å) and angles (°) in the structure of **6**.

| Bond lengths             |            |                                         |            |
|--------------------------|------------|-----------------------------------------|------------|
| Pb1-N5 <sup>i</sup>      | 2.525(7)   | Pb1-O1                                  | 2.549(4)   |
| Pb1-N1 <sup>ii</sup>     | 2.666(4)   | Pb1-N4 <sup>iii</sup>                   | 2.718(4)   |
| Pb1-S1                   | 3.0464(17) |                                         |            |
| Bond angles              |            |                                         |            |
| N5 <sup>i</sup> -Pb1-O1  | 73.6(2)    | N5 <sup>i</sup> -Pb1-N1 <sup>ii</sup>   | 80.63(19)  |
| O1-Pb1-N1 <sup>ii</sup>  | 75.49(13)  | N5 <sup>i</sup> -Pb1-N4 <sup>iii</sup>  | 76.89(16)  |
| O1-Pb1-N4 <sup>iii</sup> | 116.78(14) | N1 <sup>ii</sup> -Pb1-N4 <sup>iii</sup> | 149.38(15) |
| N5 <sup>i</sup> -Pb1-S1  | 94.9(3)    | O1-Pb1-S1                               | 155.66(10) |
| N1 <sup>ii</sup> -Pb1-S1 | 81.57(10)  | N4 <sup>iii</sup> -Pb1-S1               | 79.95(10)  |

Symmetry codes – i: 2-x, -y, 2-z; ii: 2-x, -y, 1-z; 2-x, 1-y, 2-z;

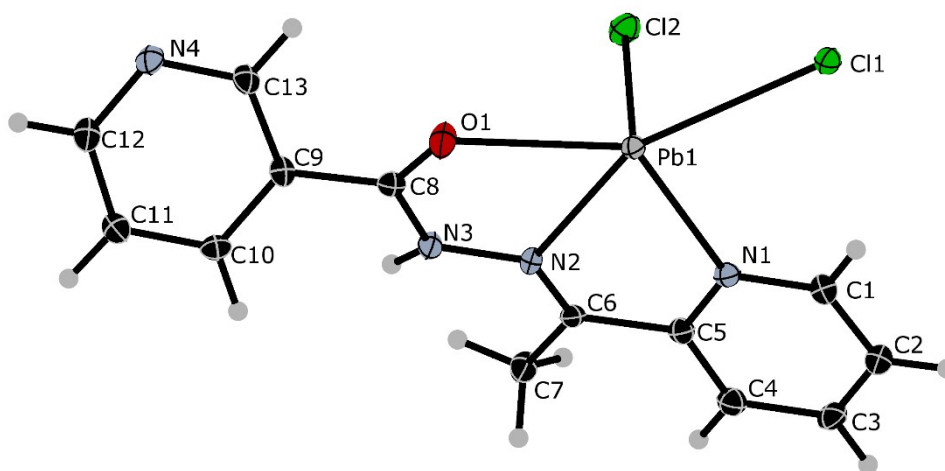

Fig. S1. Asymmetric unit of **1**. Thermal ellipsoids drawn with 50% probability

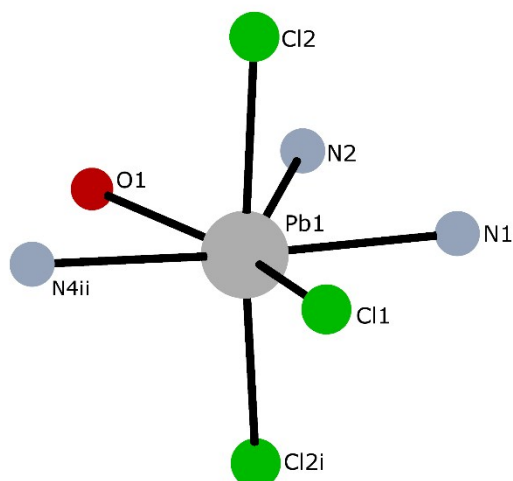

Fig. S2. Coordination environment of Pb cation in the structure of **1**.  
Symmetry codes i:  $x, 0.5-y, 0.5+z$ ; ii:  $-x, -y, -z$ ;

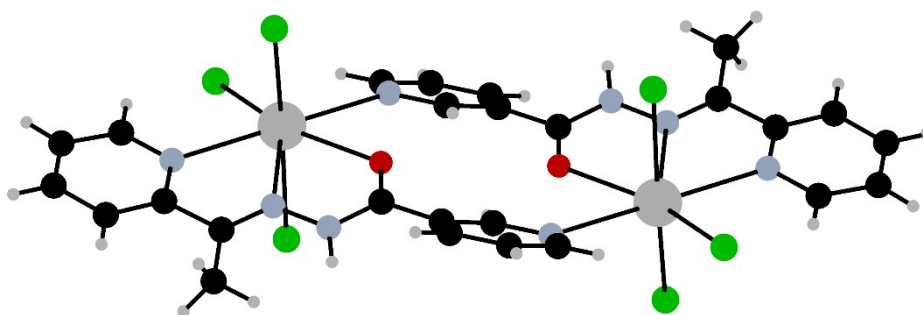

Fig. S3. Coordination subunit in the structure of **1**.

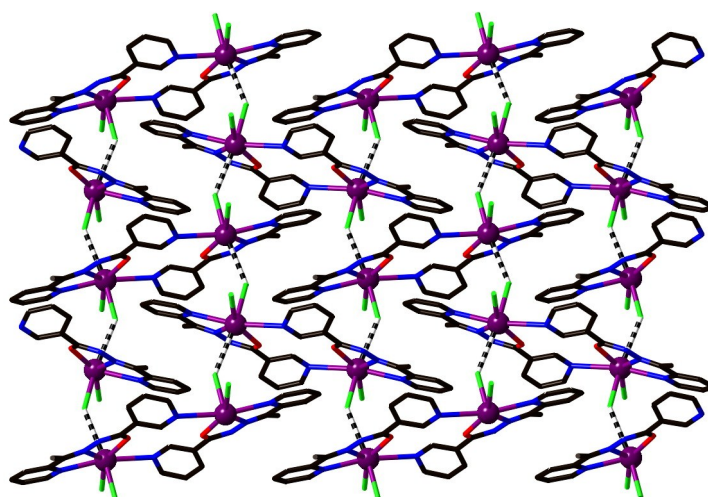

Fig. S4. The sheet structure of **1**; the longer Pb-Cl (3.105 Å) interactions are highlighted by the striped bonds.



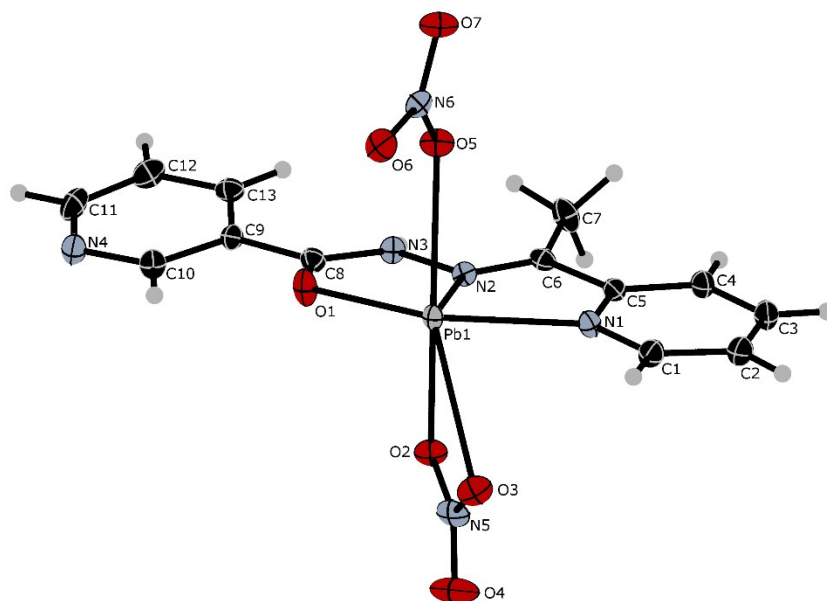

Fig. S5. Asymmetric unit of **2**. Thermal ellipsoids drawn with 50% probability.

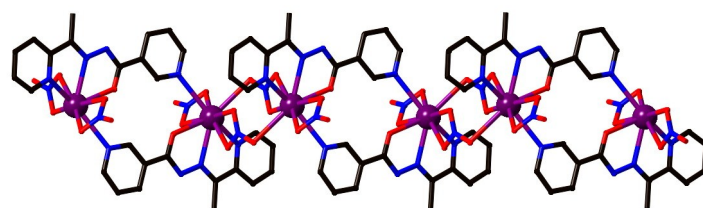

(a)

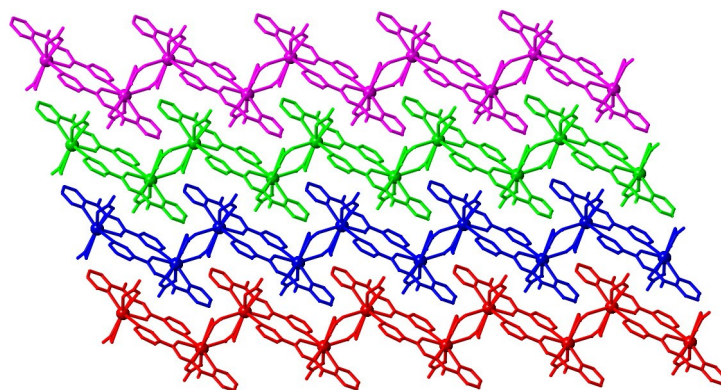

(b)

Fig. S6 (a) The structure of the 1D coordination polymer **2**. (b) A layer of chains.

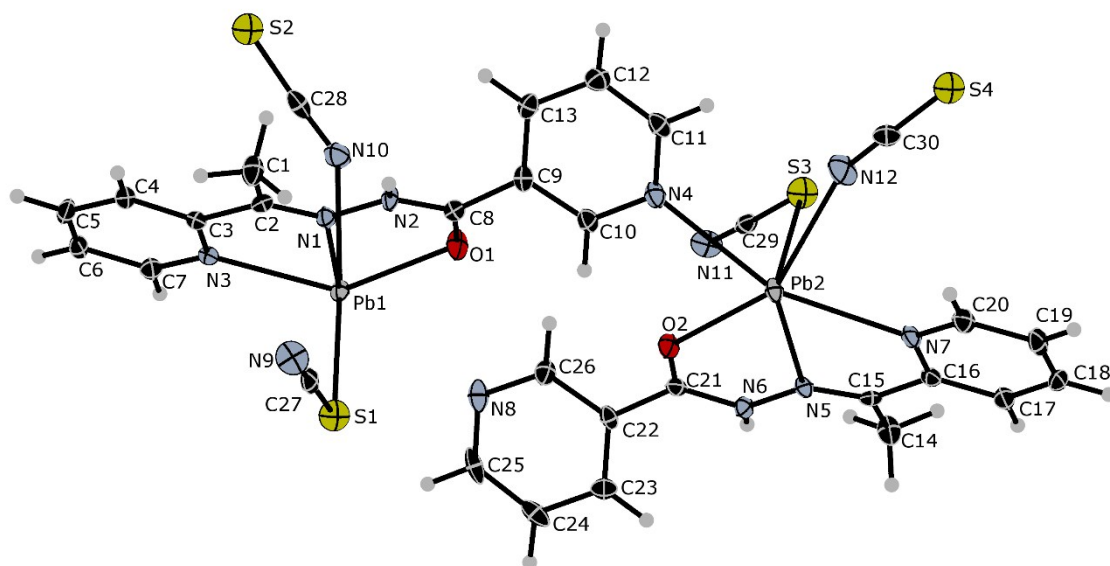

Fig. S7. Asymmetric unit of **3**. Thermal ellipsoids drawn with 50% probability.

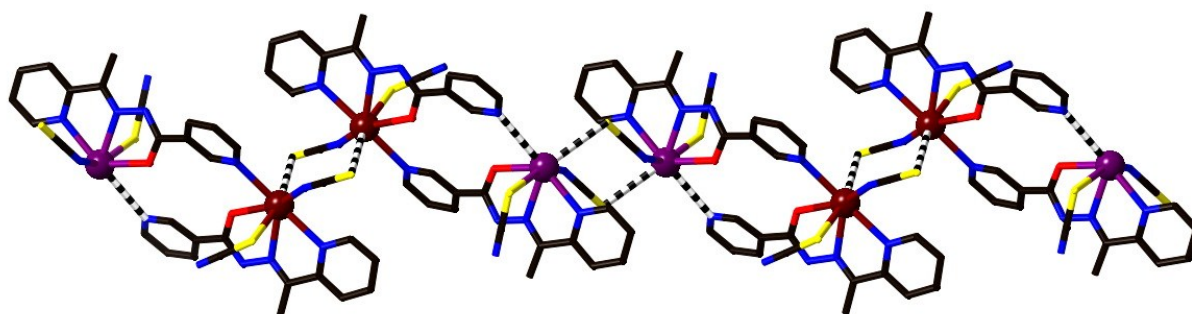

Fig S8 The assembly of dimers into 1D chains in the structure of **3**. Weaker ( $\text{Pb-N/S} > 3.1 \text{ \AA}$ ) interactions are shown by the striped bonds. Purple spheres represent the Pb1 atoms, while the brown spheres represent the Pb2 atoms.

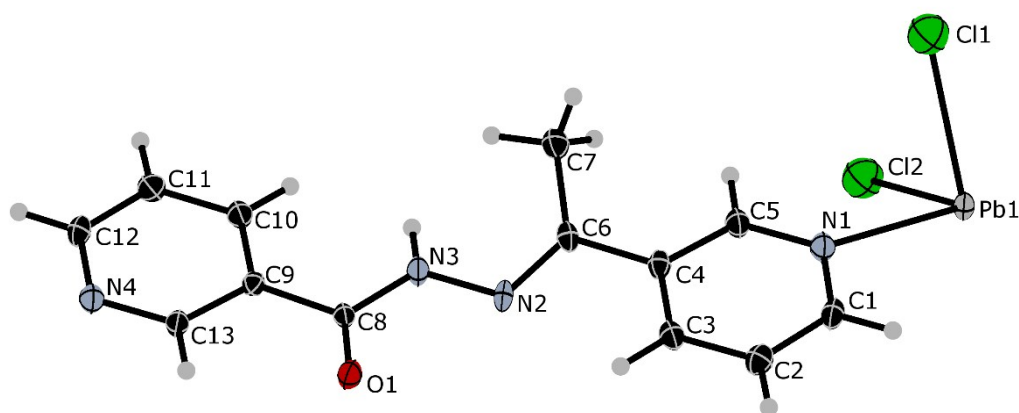

Fig. S9. Asymmetric unit of **822**. Thermal ellipsoids drawn with 50% probability.

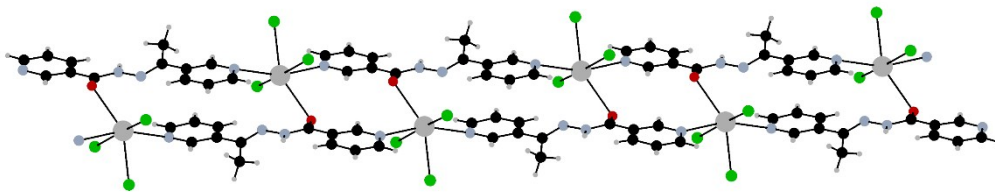

Fig. S10. Double coordination chain in the structure of 4.

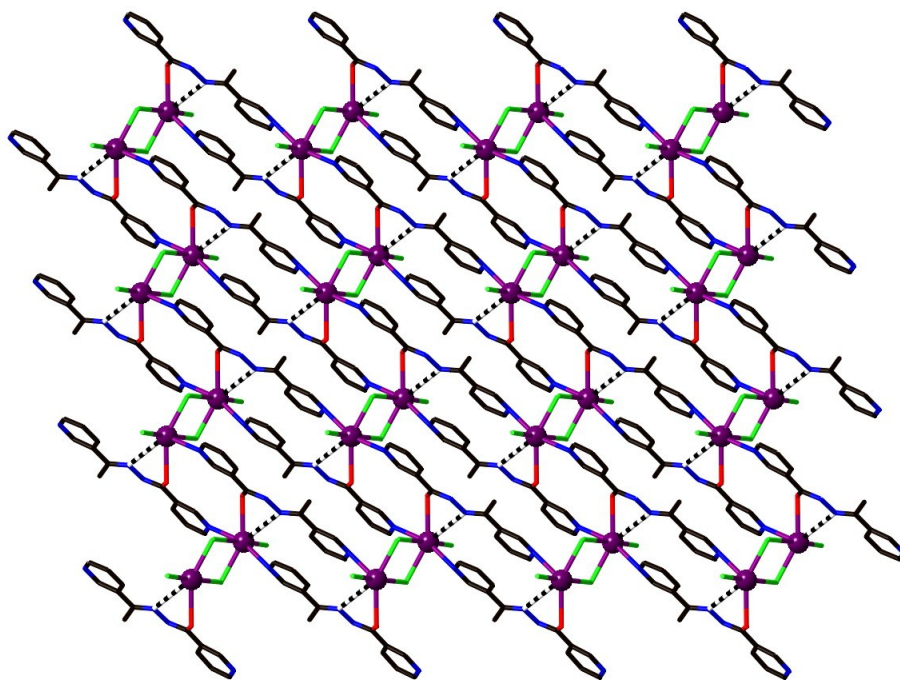

(a)

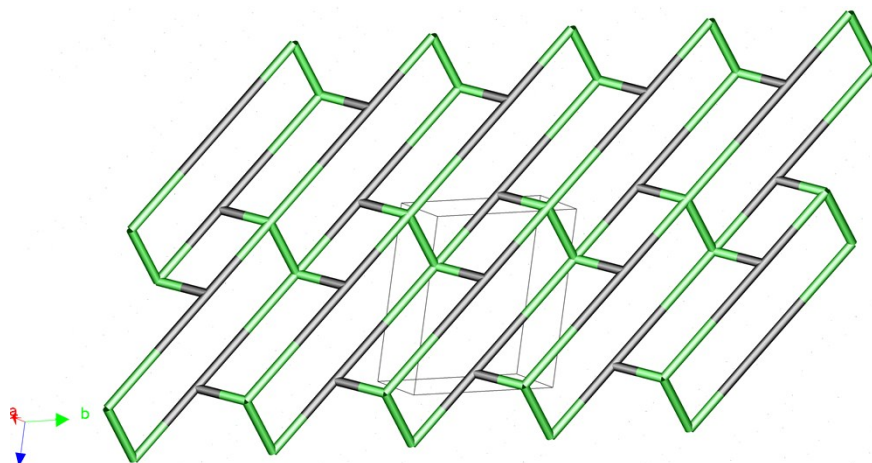

(b)

Fig. S11 (a). The 2D sheet structure of **4**; long Pb-N interactions highlighted by the striped bonds  
(b) Schematic representation of 2D Sheet.

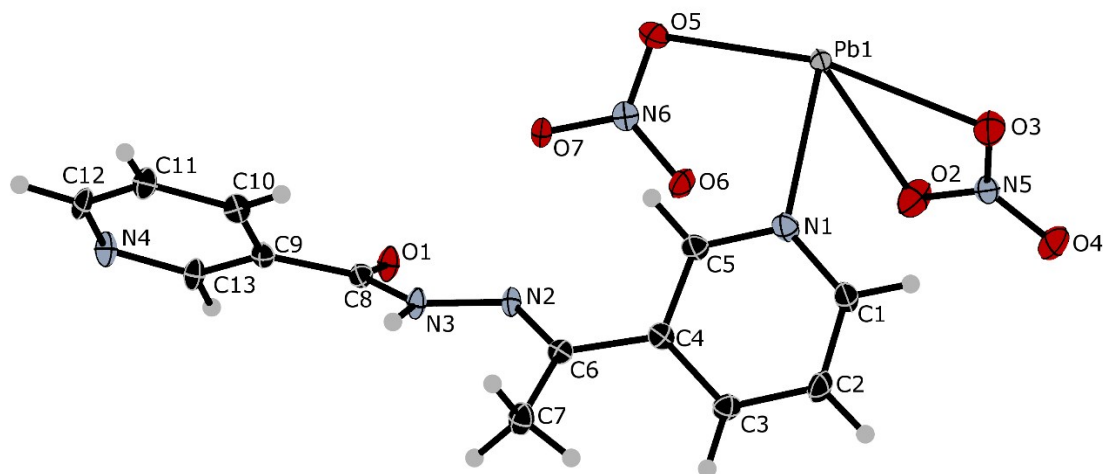

Fig. S12. Asymmetric unit of **5**. Thermal ellipsoids drawn with 50% probability.

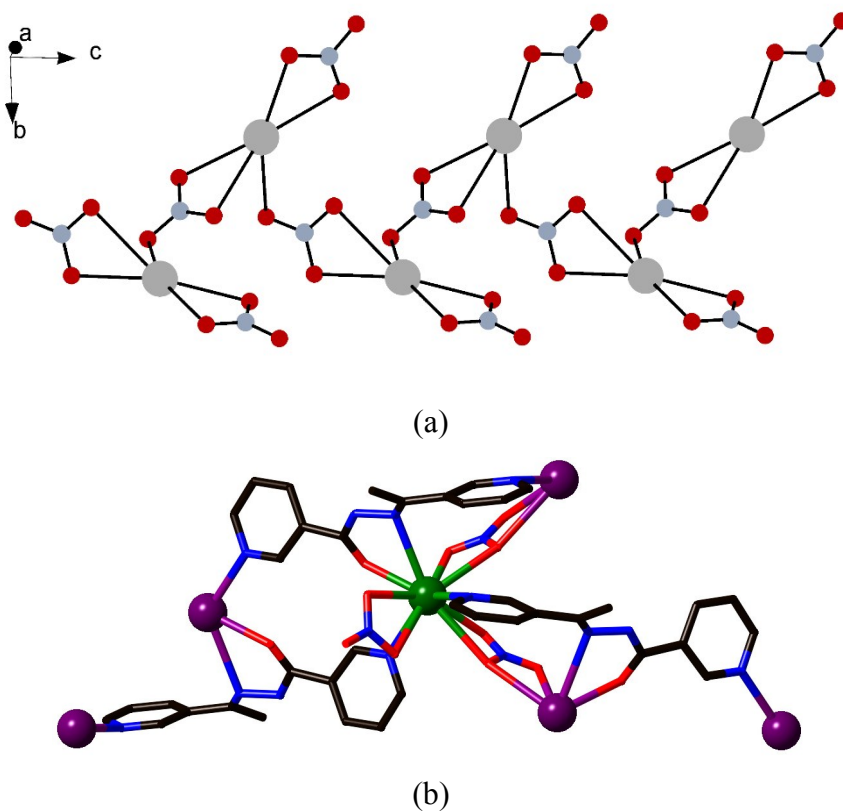

Fig. S13. (a) Fragment of a infinite 1D chain in **5** (b) Local Pb, L2 and nitrate connectivity in **5** (Pb highlighted in green has complete coordination sphere shown).

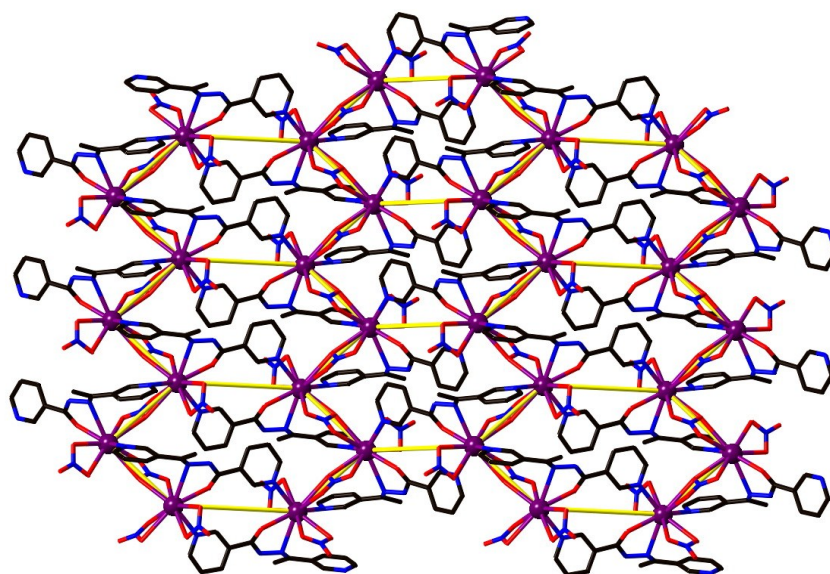

Fig. S14 The complicated 2D sheet formed in **5**; yellow bonds highlight the (6,3) connectivity.

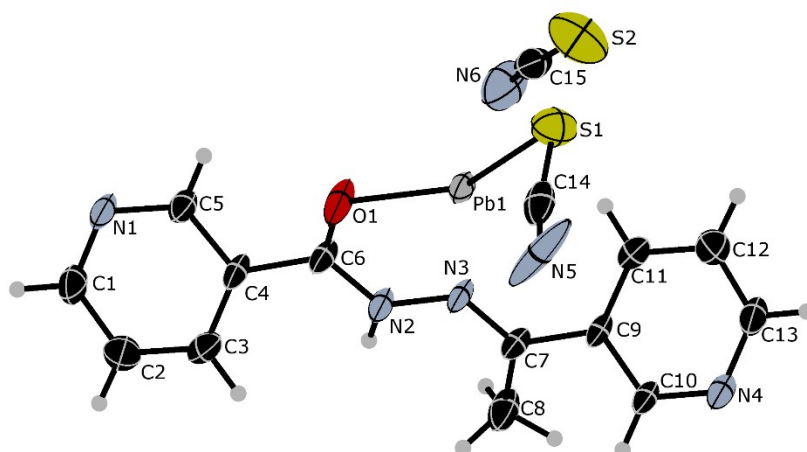

Fig. S15. Asymmetric unit of **6**. Thermal ellipsoids drawn in 50% probability

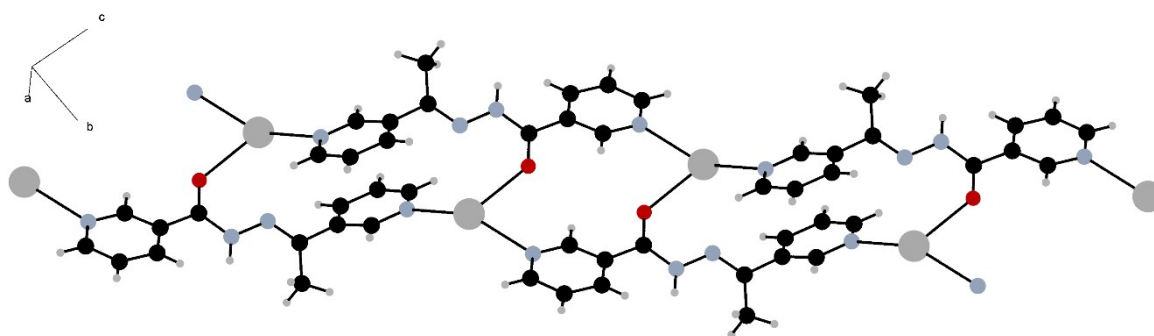

Fig. S16. Coordination chain in the structure of **6**.



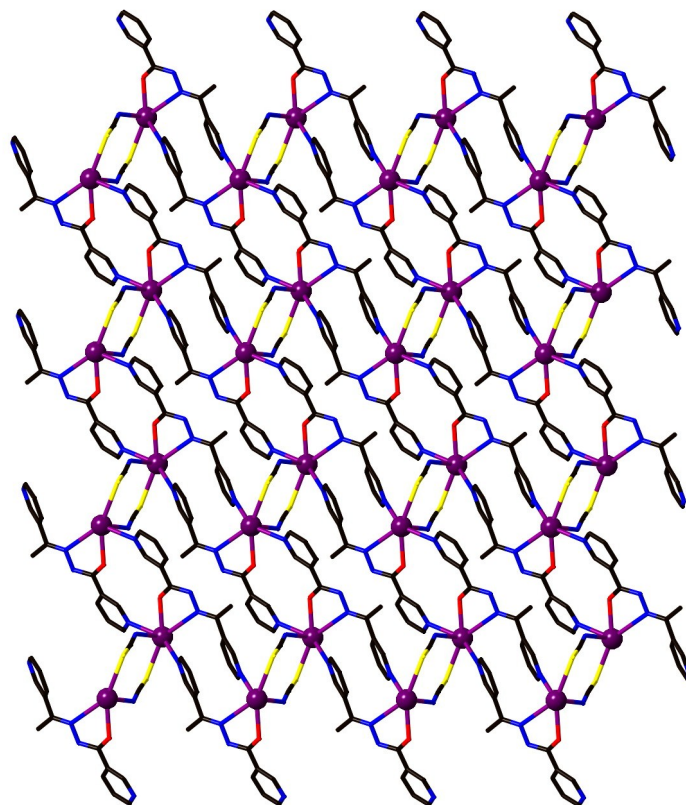

Fig. S17 The sheet structure of 6; further weakly bound monodentate SCN anions are omitted for clarity.

## Detailed Hirshfeld surface analyses.

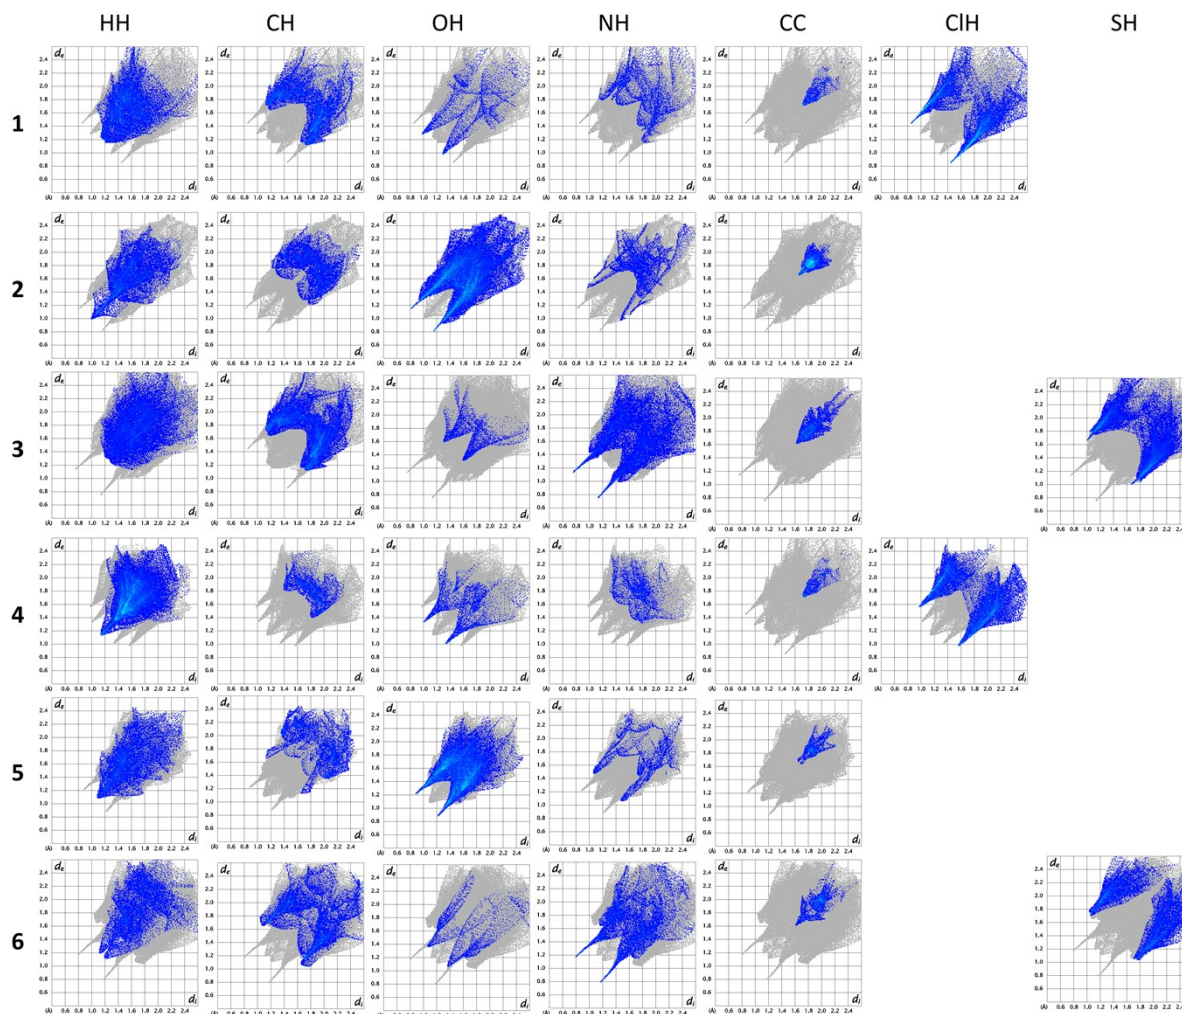

Fig. S18 Decomposition of Hirshfeld surfaces into contributions of main contacts for **1-6**.

On the Hirshfeld surface of a monomer of **1** fourteen red areas can be seen, apart from those arising from the covalent Pb-Cl bonds connecting the monomeric units into a polymer, which are a consequence of one C-H $\cdots$ O bond (C13-H13 $\cdots$ O1) and the remaining twelve are due to six C-H $\cdots$ Cl and N-H $\cdots$ Cl interactions (C4-H4 $\cdots$ Cl2, C12-H12 $\cdots$ Cl1, C11-H11 $\cdots$ Cl2, C10-H10 $\cdots$ Cl1, C7-H7 $\cdots$ Cl1 and N3-H3 $\cdots$ Cl1). When shape index function is applied one can see large red ‘hollows’ indicating presence of C-H $\cdots$  $\pi$  interactions. Analysis of decomposed fingerprint plots indicates that the most important types of interactions in packing in the structure of **1** are van der Waals forces (H $\cdots$ H, 24.0%), C-H $\cdots$ C and C-H $\cdots$  $\pi$  interactions (21.0%) and weak hydrogen bonds involving chlorine ions (H $\cdots$ Cl, 24.6%).

Analysis of the Hirshfeld surface of the complex molecule of **2** mapped with  $d_{\text{norm}}$  function (combined with analysis of the 2D fingerprint plot indicates that the main type of interaction

taking part in the packing of molecules of **2** are hydrogen bonds in which oxygen atom acts as an acceptor (47.6% of the Hirshfeld surface). Several red areas on the Hirshfeld surface correspond to the presence of one strong hydrogen bond (N3-H3 $\cdots$ O2) as well as five weaker ones (C10-H10 $\cdots$ O1, C12-H12 $\cdots$ O5, C13-H13 $\cdots$ O4, C3-H3A $\cdots$ O5 and C4-H4 $\cdots$ O6). The strong hydrogen bonds are evident in decomposed H $\cdots$ O fingerprint plot where are present two spikes. There are also red areas which are connected with the presence of H $\cdots$ H (C10-H10 $\cdots$ H10<sup>i</sup>-C10<sup>i</sup>, where i: -x, -y, -z) and H $\cdots$ C (C13-H13 $\cdots$ C13<sup>i</sup>, where i: -x, -y, -z) contacts. The former constitute 17% of the Hirshfeld surface, the shortest one can be noticed on a decomposed H $\cdots$ H fingerprint plot as a central ‘spike’, while the latter make up 11.2% of the Hirshfeld surface. Two additional large red areas on the surface correspond to short Pb $\cdots$ N contacts (2.923 Å). When shape index function is used to map the surface, bow-tie motifs can be noticed which indicates presence of aromatic ring stacking interactions. This is consistent with bright spot on the decomposed C $\cdots$ C fingerprint plot.

When Hirshfeld surface of **3** is mapped with  $d_{\text{norm}}$  function several red areas can be noticed. They correspond to the existence of multiple strong N-H $\cdots$ N and weaker C-H $\cdots$ N, C-H $\cdots$ S hydrogen bonds as well as C-H $\cdots$ C interactions. H $\cdots$ N contacts (N6-H2N $\cdots$ N11, N2-H1N $\cdots$ N9, C14-H14C $\cdots$ N11, C25-H25 $\cdots$ N10 mentioned above) constitute 18% of Hirshfeld. Short N-H $\cdots$ N hydrogen bonds are noticeable as long, sharp ‘spikes’ on the 2D plot. H $\cdots$ S hydrogen bonds make 19.1% of the surface, while other weak interactions, H $\cdots$ H and H $\cdots$ C constitute 20.4% and 19.7% of the Hirshfeld surface.

Because compound **6** is polymeric (like compound **1**) a segment of the structure has been chosen for Hirshfeld surface analysis. Surface has been generated for part of the 1D chain containing two ligand molecules, two Pb<sup>2+</sup> cations and two SCN<sup>-</sup> ions. Since part of the chain is enveloped in the surface ten large red spots are visible on the surface mapped with  $d_{\text{norm}}$  function. Four of them are due to Pb-S tetrel bonds and six to Pb-N coordination bonds. From all other red areas two large ones stand out. They correspond to strong N-H $\cdots$ N hydrogen bond between ligand molecules and non coordinated SCN<sup>-</sup> ions (N2-H2N $\cdots$ N6). There are also eight smaller red spots which presence is consistent with four weak C-H $\cdots$ X (X = N, S) hydrogen bonds (C8-H8A $\cdots$ N6, C3-H3 $\cdots$ N6, C13-H13 $\cdots$ S2, C8-H8A $\cdots$ S2). Several additional small red areas correspond to a number of C-H $\cdots$ C interactions (C11-H11 $\cdots$ C15, C10-H10 $\cdots$ H14, C8-H8 $\cdots$ C15). When shape index function is applied ‘bow-tie’ patterns indicative of  $\pi\cdots\pi$  stacking interactions as well as red hollow areas indicating C-H $\cdots$  $\pi$  interactions are present (Fig. 11b). According to data from decomposed fingerprint plots van der Waals forces (18.2%), C-H $\cdots$ C interactions (19.9%) and weak C-H $\cdots$ X (X = S, N)



hydrogen bonds ( $\text{H}\cdots\text{N}$  – 13.2% and  $\text{H}\cdots\text{S}$  – 20.0%) constitute most of the forces responsible for packing of coordination chains in **6**. Asymmetry of decomposed fingerprint plots for  $\text{H}\cdots\text{C}$  and  $\text{H}\cdots\text{N}$  contacts is caused by the fact that the part of the chain inside the surface contains donor atoms for  $\text{N-H}\cdots\text{N}$  hydrogen bonds and most donors of  $\text{C-H}\cdots\text{C}$  interactions.

IR-spectra

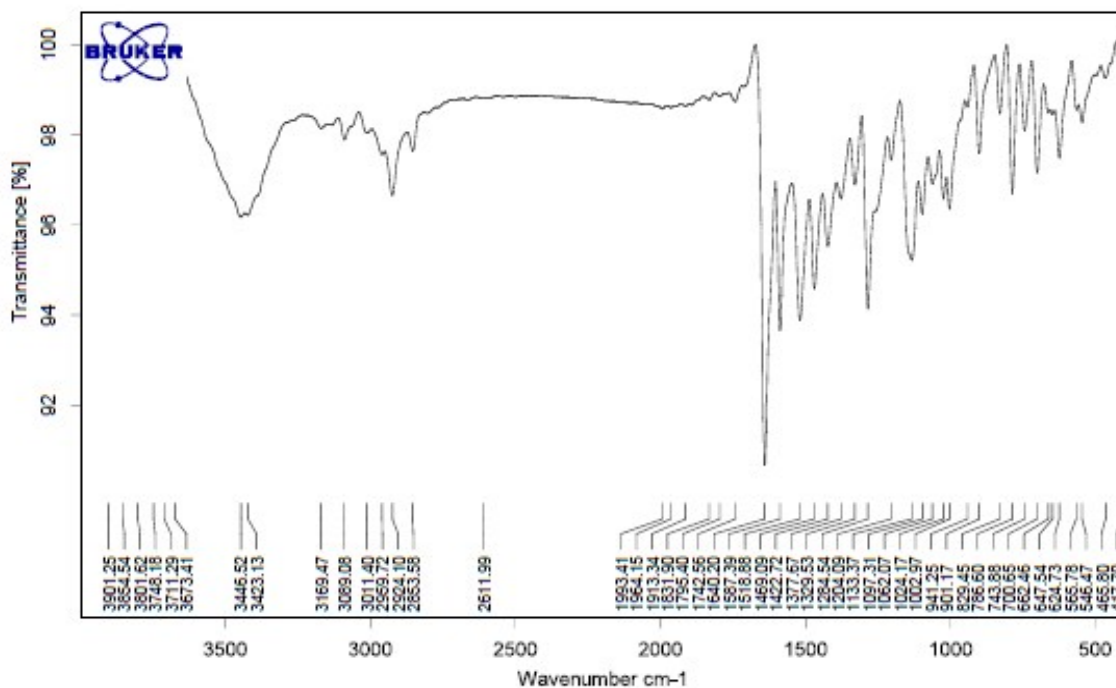

Fig. S19 IR spectrum of 1.

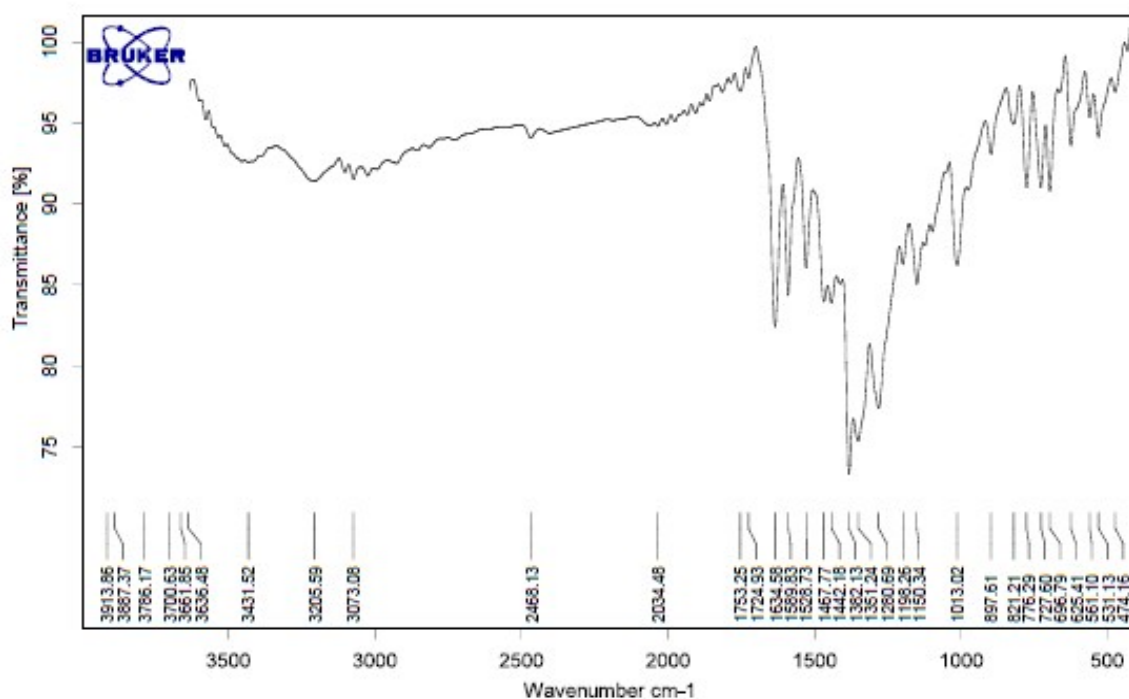

Fig. S20 IR spectrum of 2.

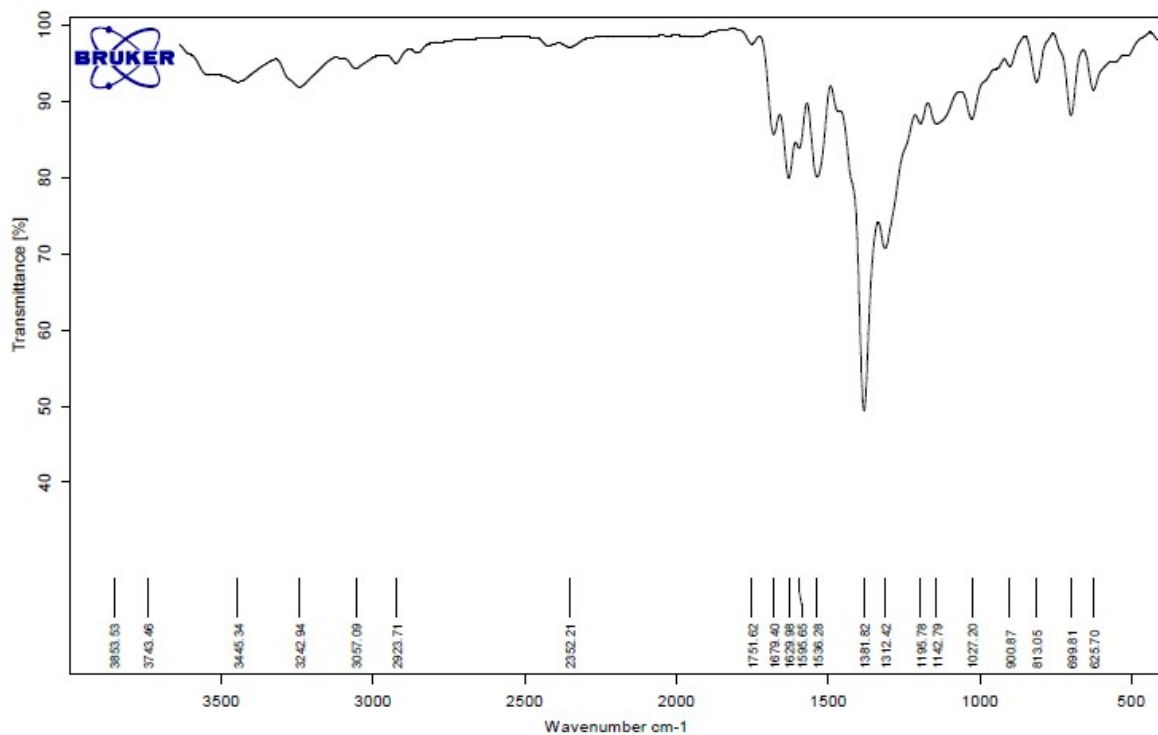

Fig. S21 IR spectrum of **5**.

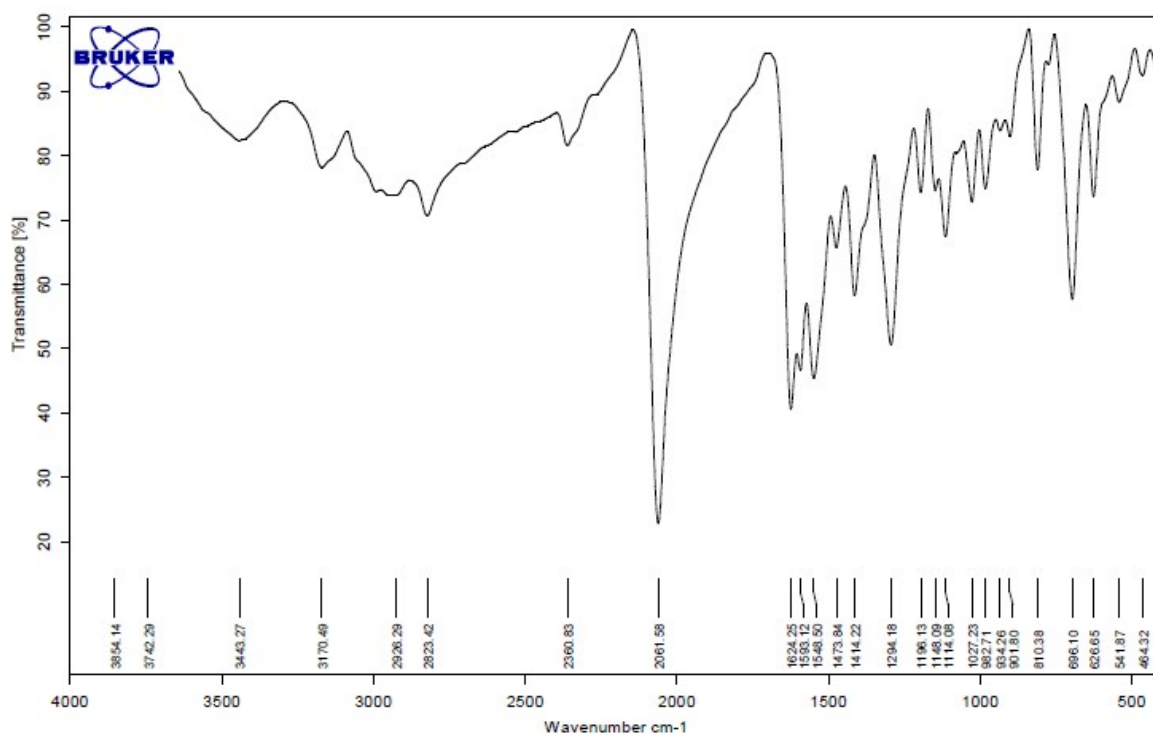

Fig. S22 IR spectrum of **6**.
